# Supplementary material for: Expression and Distribution of the Auxin Response Factors in Sorghum bicolor During Development and Temperature Stress
Source: PubMed Central journal article supplement (PMC6801764; doi:10.3390/ijms20194816), 2019-09-27
Supplement: ijms-20-04816-s001.pdf [file ijms-20-04816-s001.pdf]

## Supplementary

**Table 1.** Details of primers used in the qRT-PCR analysis in the study.

| Gene           | Primers                        |
|----------------|--------------------------------|
| <i>β-actin</i> | 5'ACGGCCTGGATGGCGACGTACATG 3'  |
|                | 5'GCAGAAGGACGCCTACGTTGGTGAC 3' |
| <i>SbARF1</i>  | 5'TCCGAGAGCCCGACGAGTT 3'       |
|                | 5'TGCGGCCTCAACAACATCC 3'       |
| <i>SbARF2</i>  | 5'CGCCGTCAAGGAGTCCATG 3'       |
|                | 5'GCCCGTCCGAAGAGCATTAT 3'      |
| <i>SbARF3</i>  | 5'CGCGTTTGTCTACCTGAGGAGTG 3'   |
|                | 5'CGGGTATGTTGATGGCAGGTG 3'     |
| <i>SbARF4</i>  | 5'CGCCGTGTGTCTGGAGCTG 3'       |
|                | 5'GGCCGTGAGCGTCTTGACAG 3'      |
| <i>SbARF5</i>  | 5'GGCGACGGACGAGGTGTAC 3'       |
|                | 5'CCAAGCCTTAGTTCACCATCATC 3'   |
| <i>SbARF6</i>  | 5'GGACGAGCCCTTCAGAGTTCAT 3'    |
|                | 5'CGTTGCTTTCAGTCAGGTTGTTC 3'   |
| <i>SbARF7</i>  | 5'TGGCAGCCTCGTCGTCTAC 3'       |
|                | 5'CGCCCACGAAAAGACTCCAC 3'      |
| <i>SbARF8</i>  | 5'TTGCCTGCGGTCGGTAGTC 3'       |
|                | 5'TCGGCGTGGAACAGAGAATC 3'      |
| <i>SbARF9</i>  | 5'TGGGCCGTTGGTCACAGTG 3'       |
|                | 5'TGCCCTCGAAAGATGTGACG 3'      |
| <i>SbARF10</i> | 5'GGCGGACGAGCAGGAGAAG 3'       |
|                | 5'GCGGAGGAACACGATGGAGTC 3'     |
| <i>SbARF11</i> | 5'GCTGCTCCGAAGGTCACATTAG 3'    |
|                | 5'TTGCCTTGCTGGTCTTGATAATG 3'   |
| <i>SbARF12</i> | 5'GGCGAGCGCGTCTATTACTTC 3'     |
|                | 5'CGCCGTGAGTGCTCGTATCT 3'      |
| <i>SbARF13</i> | 5'ACGCCGCCCTGGTGAAGAC 3'       |
|                | 5'CGGGCTGGAGCTTCTTGTTG 3'      |
| <i>SbARF14</i> | 5'GCGGCAATGTCTTCTAGTTATG 3'    |
|                | 5'CTCCCGTGCAGAAATTGAATC 3'     |
| <i>SbARF15</i> | 5'CTGCCAGCTCCATGATGTCAC 3'     |
|                | 5'CCTCGGAAGATATGCCTGAATT 3'    |

|                |                               |
|----------------|-------------------------------|
| <i>SbARF16</i> | 5' CGCGGACGACAAGACCAAC 3'     |
|                | 5' GGCGCATGAAGACGACGAT 3'     |
| <i>SbARF17</i> | 5' GCCCATGCAGCAGCTAATAACAG 3' |
|                | 5' TGGCGAGGGATAAATGAAGAATG 3' |
| <i>SbARF18</i> | 5' TGCGCCACCAACAAATGAGG 3'    |
|                | 5' GCCGAACCCCAACACGTAAC 3'    |
| <i>SbARF19</i> | 5' GCCGGTTCGTCTACTTTCCTC 3'   |
|                | 5' CGGCGCGGAACAGAGAATC 3'     |
| <i>SbARF20</i> | 5' GGCGGAGGATAAGATGTTTGG 3'   |
|                | 5' GCTCGCCATCACTACCTCTCAG 3'  |
| <i>SbARF21</i> | 5' CCGCAGGCACCTTTTAACC 3'     |
|                | 5' TTGGCTTAATCTGGGGTTGTAGT 3' |
| <i>SbARF22</i> | 5' CGCCGTGCAGCTGAGAAGATAT 3'  |
|                | 5' GCCTGTGATCGTGCCCATGTAT 3'  |
| <i>SbARF23</i> | 5' CGCAAGAAGTGAAGGACCCATAT 3' |
|                | 5' GCCCTTGGGTTGTAGAAAATTGT 3' |
| <i>SbARF24</i> | 5' CGCCGGGTTCTCCATGTTC 3'     |
|                | 5' GCGGAGACAGTGCCCATGAAC 3'   |
| <i>SbARF25</i> | 5' CCGCCACATATATCGAGGTCAG 3'  |
|                | 5' CGCCATTGTGAGTTTTTCCATCT 3' |

**Table 2.** The gene-specific probes used in the situ hybridization.

| Gene         | Probes                                          |
|--------------|-------------------------------------------------|
| <i>ARF3</i>  | TCCCCTACTCCCACAGTCATCTTGTGTCAGCAATGCCGCTACTCCTA |
| <i>ARF15</i> | GCAGTGGGAACAGGGATGGATACATAGGAAAGGTTGTGTCAGTGGCT |
| <i>ARF17</i> | CGAAAGAATCCTGATGCACCCGGACGCAGT                  |
| <i>ARF24</i> | GCACGGTCTGGACGGGCGGGTCGGCGGAGTAG                |

**Table 3.** The sequence information of 20 motifs.

| Discovered Motifs | Sequences                                                                           | E-value                 | Sites | Width |
|-------------------|-------------------------------------------------------------------------------------|-------------------------|-------|-------|
| 1                 | SFCKTLTASDTSTHGGFSVPRRAAEKCFPLDYSQPPVQELVAKDLHGNEWKFRHIYRGQPRRH<br>LLTTGWSVVFVSAKRL | $9.6 \times 10^{-1367}$ | 23    | 80    |
| 2                 | SVLSSDSMHJGVLA AAAHAAATGSPFTVFYNPRASPSEFVVPLAKYLY                                   | $2.7 \times 10^{-535}$  | 25    | 51    |
| 3                 | CLNSELWHACAGPLVSLPPVGLVYYFPQGHSEQVAASTBK                                            | $7.0 \times 10^{-522}$  | 24    | 41    |

|    |                                                                                                        |                         |    |     |
|----|--------------------------------------------------------------------------------------------------------|-------------------------|----|-----|
| 4  | WPNSKWRSLSKVGWDEPTAGZRPNRVSPWEIEP                                                                      | $6.0 \times 10^{-404}$  | 24 | 32  |
| 5  | PNLPPKLJCRVHNVTLHADPDTDEVYAQITLQP                                                                      | $1.5 \times 10^{-390}$  | 24 | 33  |
| 6  | WKL VYVDREGDVLLVGDDPWEEFVNSVRCIKILSPEEVQQM                                                             | $8.8 \times 10^{-339}$  | 18 | 41  |
| 7  | VGRSLDJTRFSGYEELRAELARMFGIEGZLED                                                                       | $3.60 \times 10^{-219}$ | 19 | 32  |
| 8  | ISVGMRFKMRFETEES                                                                                       | $2.00 \times 10^{-201}$ | 24 | 17  |
| 9  | VAGDSVLFJRGEGBZLRLGIRANRQQTN                                                                           | $3.90 \times 10^{-306}$ | 24 | 29  |
| 10 | RRFMGTITGISDLDP                                                                                        | $7.70 \times 10^{-122}$ | 24 | 15  |
| 11 | RVRTFTKVYKSGS                                                                                          | $2.10 \times 10^{-45}$  | 14 | 13  |
| 12 | KDQEVKPSCKLFGISIDSEE                                                                                   | $2.10 \times 10^{-37}$  | 21 | 21  |
| 13 | LTTFPMYPSPFPLRLKRPWPSGLPSLHGG                                                                          | $6.90 \times 10^{-27}$  | 4  | 29  |
| 14 | GNPGFQSLNFQGLGISPWMQPRLDPSLLGLQPDMYQAMAAAA                                                             | $3.60 \times 10^{-26}$  | 4  | 42  |
| 15 | DSSEMENLFKRAMPWLGEEICIKDVQTQN                                                                          | $5.60 \times 10^{-24}$  | 4  | 29  |
| 16 | KYQBHJSADIDGNYRIPKDAQQEISSMVSQSFGVSDIAFNSDSAINDGPFLNRNSWPPAP                                           | $1.30 \times 10^{-28}$  | 3  | 62  |
| 17 | TVMPGLSLVQWMNMNRQQNSSFGNSGIQSEYLRSLSNPNMQNLGAAELARQLNMQNQJLQQ<br>NSIQFNAPKLPQQMQPINELAKGSLPCNQLGVGKQEQ | $1.90 \times 10^{-18}$  | 2  | 143 |
| 18 | GLEPGQCKVFVESET                                                                                        | $3.50 \times 10^{-18}$  | 5  | 15  |
| 19 | GNPGFSYQCSGFGESVRFQEVLQEQEVR                                                                           | $8.20 \times 10^{-17}$  | 4  | 29  |
| 20 | AAPFFIPPPFFRPKRPRQPA                                                                                   | $1.00 \times 10^{-15}$  | 9  | 21  |

Background Source : A Alanine, C Cysteine, D Aspartic acid, E Glutamic acid, F Phenylalanine, G Glycine, H Histidine, I Isoleucine, K Lysine, L Leucine, M Methionine, N Asparagine, P Proline, Q Glutamine, R Arginine, S Serine, T Threonine, V Valine, W Tryptophan, Y Tyrosine.

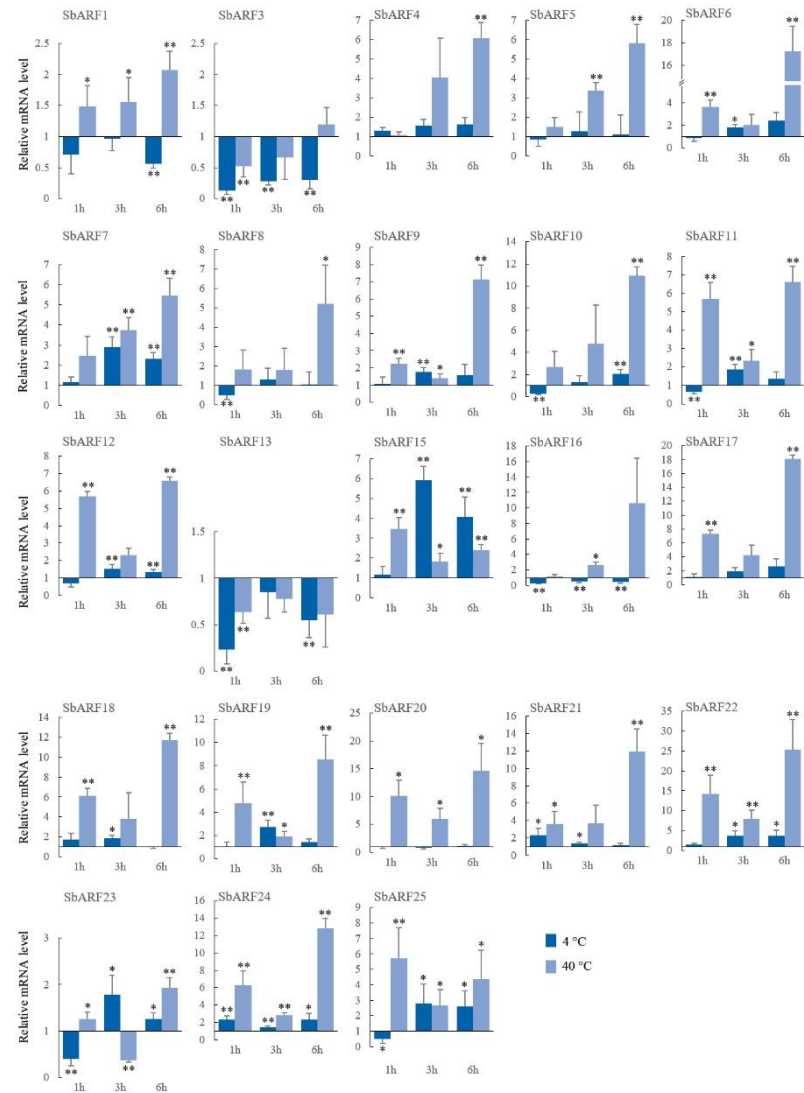

**Figure S1.** Expression of *SbARF* genes in sorghum seedling under cold and heat stress. Data from three biological replicates are displayed with standard deviation. The expression level of *ARF* gene under non-stressed condition was defined as 1. Asterisks on the top of bars indicate significant differences as determined by Student's t-test (\*:  $p < 0.05$ ; \*\*:  $p < 0.01$ ).
